# Supplementary material for: Spindle motility skews division site determination during asymmetric cell division in Physcomitrella
Source: PubMed Central journal article supplement (PMC9072379; doi:10.1038/s41467-022-30239-1), 2022-05-05
Supplement: 41467_2022_30239_MOESM1_ESM.pdf [file 41467_2022_30239_MOESM1_ESM.pdf]

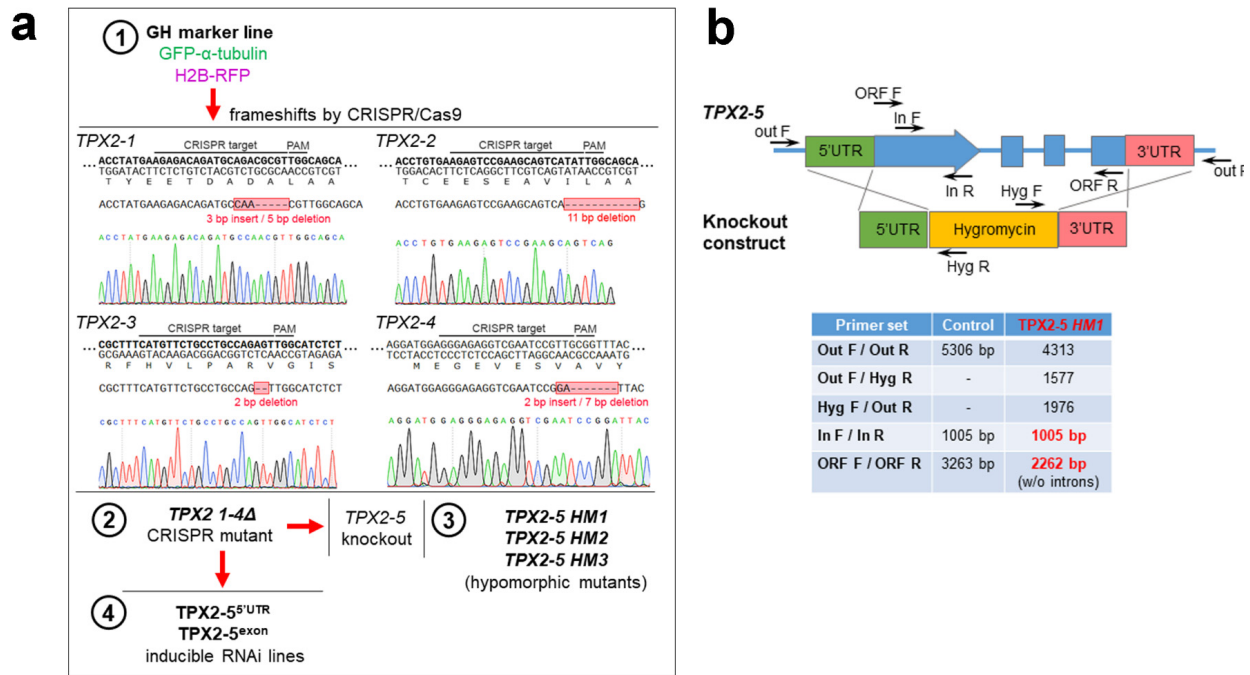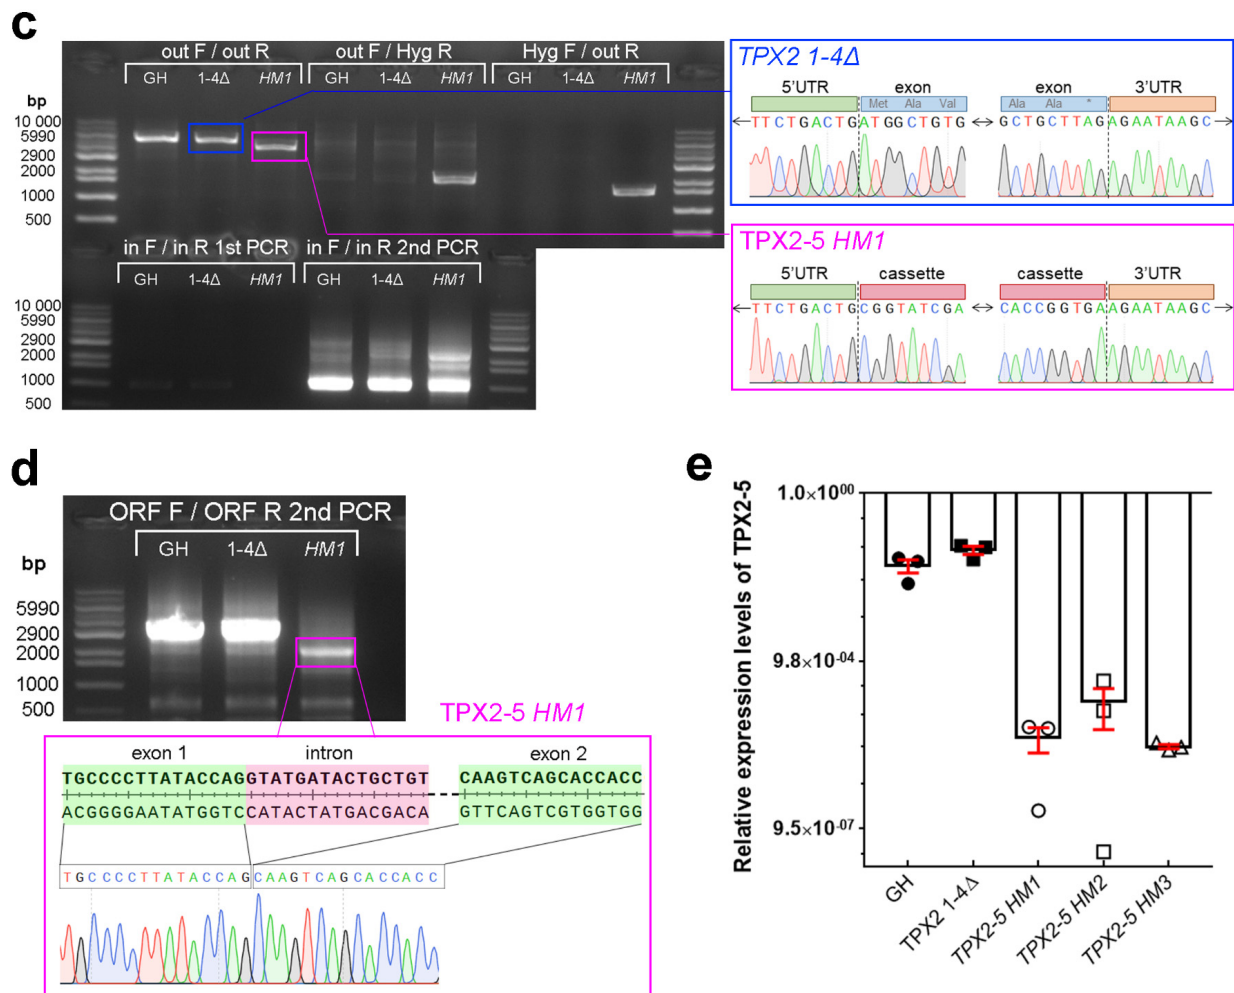

### Supplementary Figure 1. Isolation of hypomorphic *TPX2-5* mutants

(a) Schematic explanation of *P. patens* lines created and used in this study and representative sequencing data of frameshift mutations in the *TPX2 1-4 $\Delta$*  line. (b) Schematic explanation of *TPX2-5* hypomorphic line selection and genotyping PCR. (c) Results of genotyping PCR and sequencing of the *TPX2-5* locus. (d) Results of amplifying full coding sequence from start to stop codons and sequencing results of the *TPX2-5* gene. Note the band shift in the *TPX2-5 HM1* line due to loss of introns. Experiment was repeated 3 times with similar results. (e) qRT-PCR analysis of *TPX2-5* expression normalized against the expression of the internal housekeeping genes *EF1a* and *L21*. Bars represent mean values  $\pm$  SEM from  $n = 3$  independent experiments.

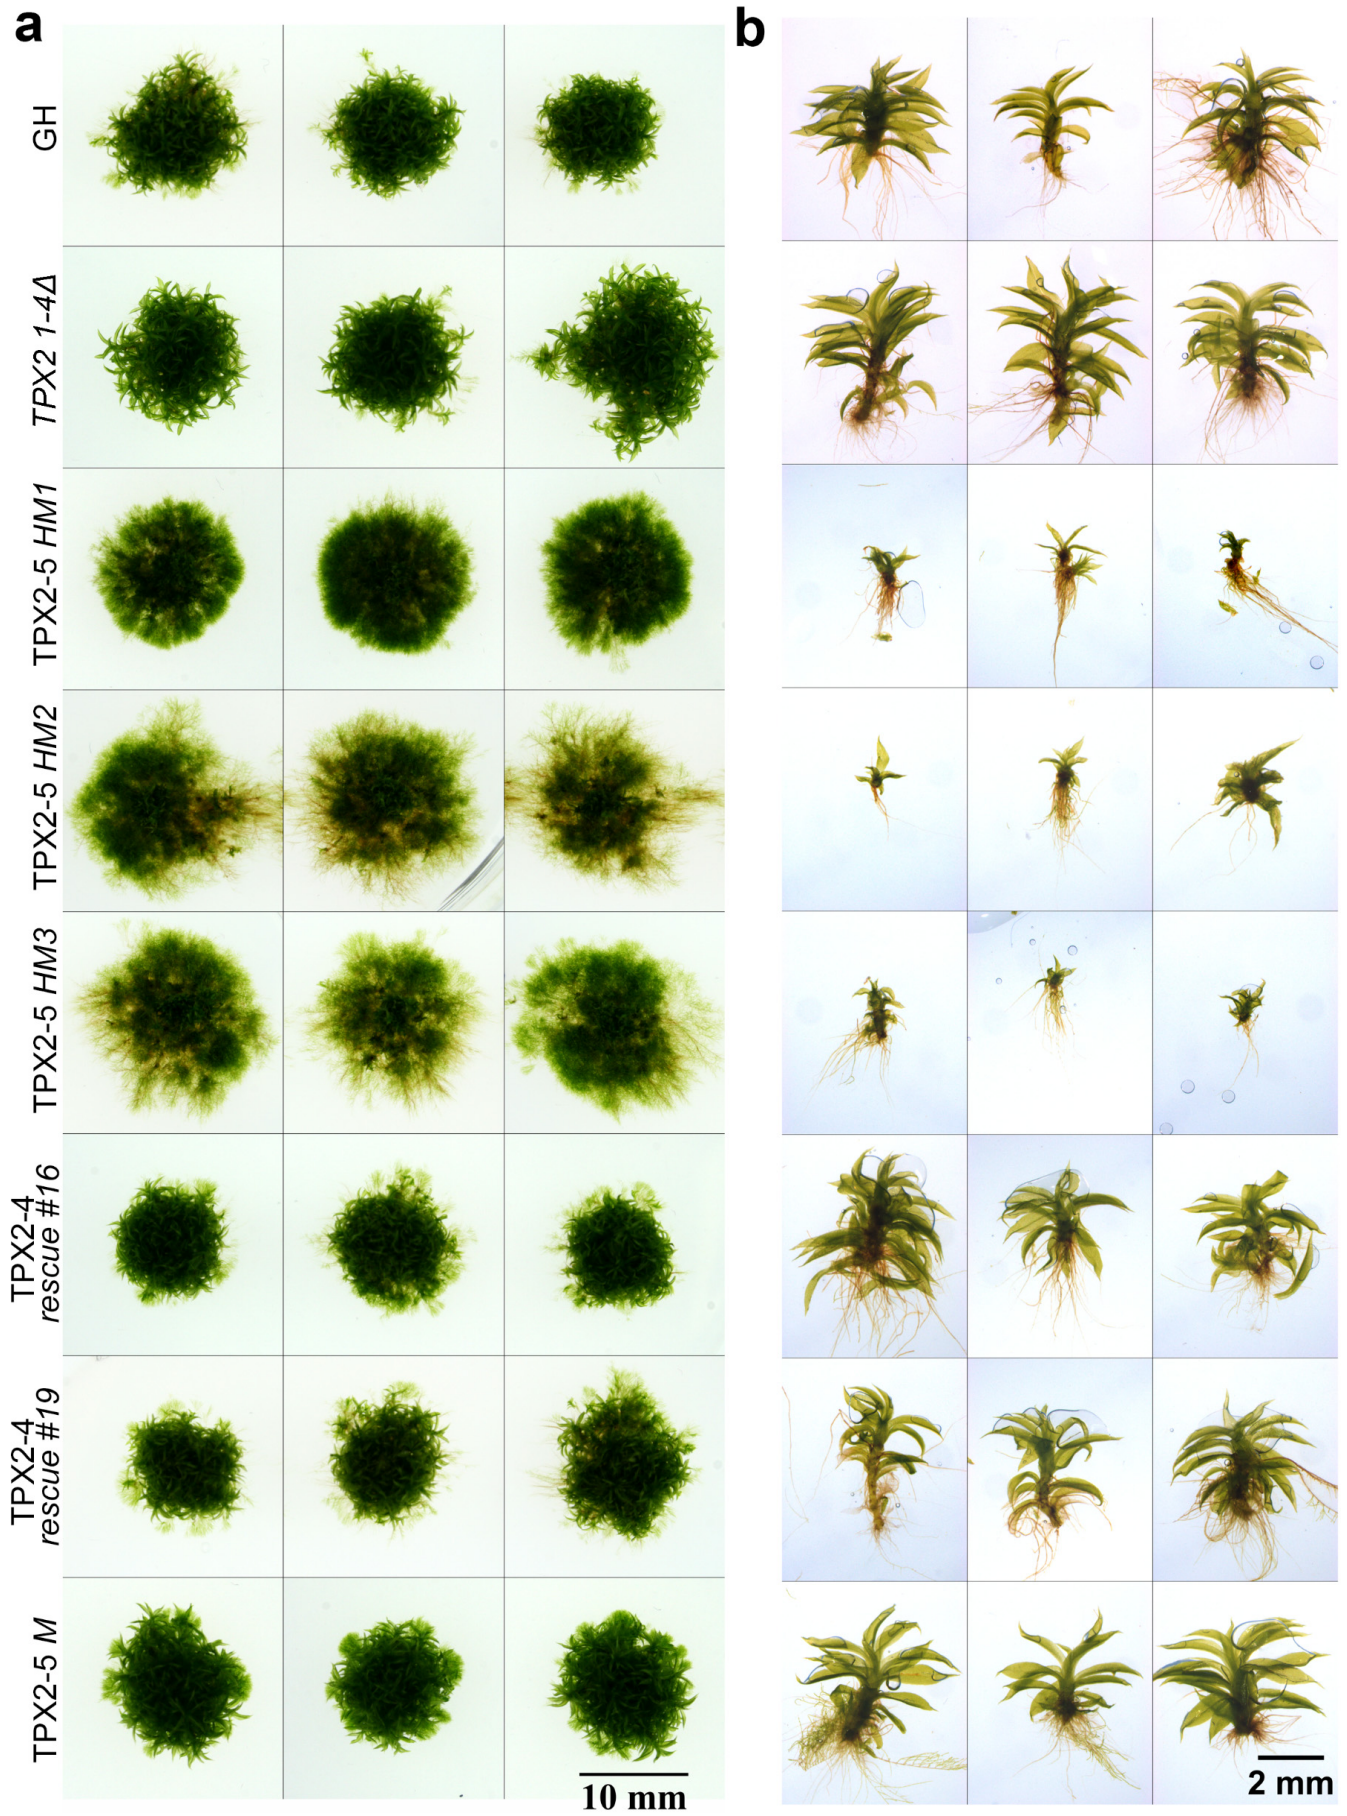

**Supplementary Figure 2. Development of *P. patens* colonies and gametophores after 4 weeks of culture**

Representative images of moss colonies (**a**) or gametophores (**b**) for all lines (except RNAi) used in this study after 4 weeks of culture on BCDAT agar plates. The brightness and contrast were linearly adjusted. Experiment was repeated 3 times with similar results. Bars, 10 mm and 2 mm, respectively.

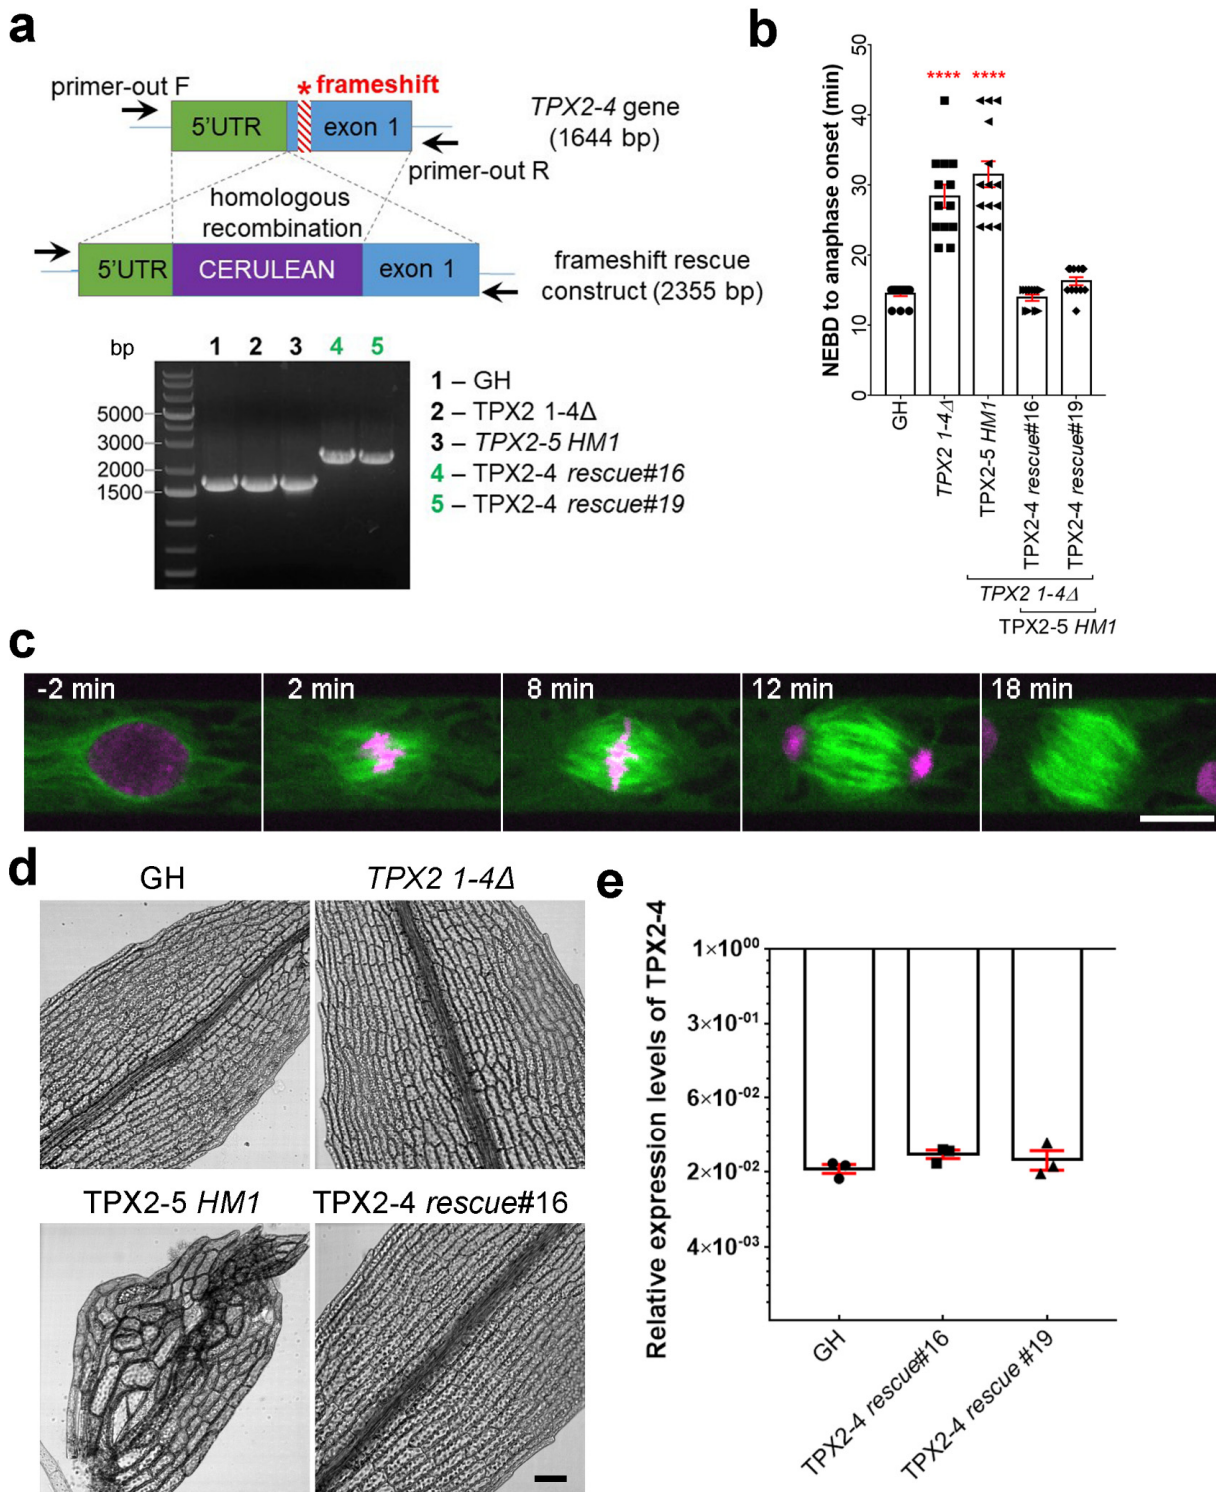

### Supplementary Figure 3. Rescue of the *TPX2-5 HMI* phenotypes by frameshift rescue of the *TPX2-4* gene

(a) Schematic illustration of the frameshift rescue experiment. In brief, the N-terminus-coding region of the *TPX2-4* gene in the *TPX2-5 HMI* background was tagged with Cerulean flanked with ~500 bp of the 5'-UTR and exon region (without the frameshift mutation) by homologous recombination. Construct integration was verified by PCR. Experiment was repeated 2 times with similar results. (b) Mitotic duration of protonemal cells calculated from NEBD to anaphase onset in GH (control,  $n = 16$  cells), *TPX2 1-4Δ* ( $n = 13$ ), *TPX2-5 HMI* ( $n = 14$ ), and two independent *TPX2-4* rescue lines #16 and #19 ( $n = 11$  and 12, respectively). Bars represent mean  $\pm$  SEM, \*\*\*\* $p=0.0001$  by one-way Anova with Dunnett's multiple comparison test against GH. (c) Mitotic progression in the *TPX2-4* rescue #16 line. Note that perinuclear MTs and prometaphase spindle formation were restored. Time 0 (min) was set at NEBD. Live-cell imaging was repeated 2 times with similar results. Bar, 10  $\mu$ m. (d) Representative images of gametophore leaf cells in GH, *TPX2 1-4Δ*, *TPX2-5 HM*, and *TPX2-4 rescue#16* lines. Imaging was performed 2 times with similar results. Bar, 100  $\mu$ m. (e) qRT-PCR analysis of *TPX2-4* expression normalized against the expression of the internal housekeeping genes *EF1α* and *L21*. No significant difference between GH and *TPX2-4 rescue#16* and #19 by one-way Anova test with Dunnett's multiple comparison test and two-tailed Student's t-test. Bars represent mean  $\pm$  SEM from  $n = 3$  independent experiments.

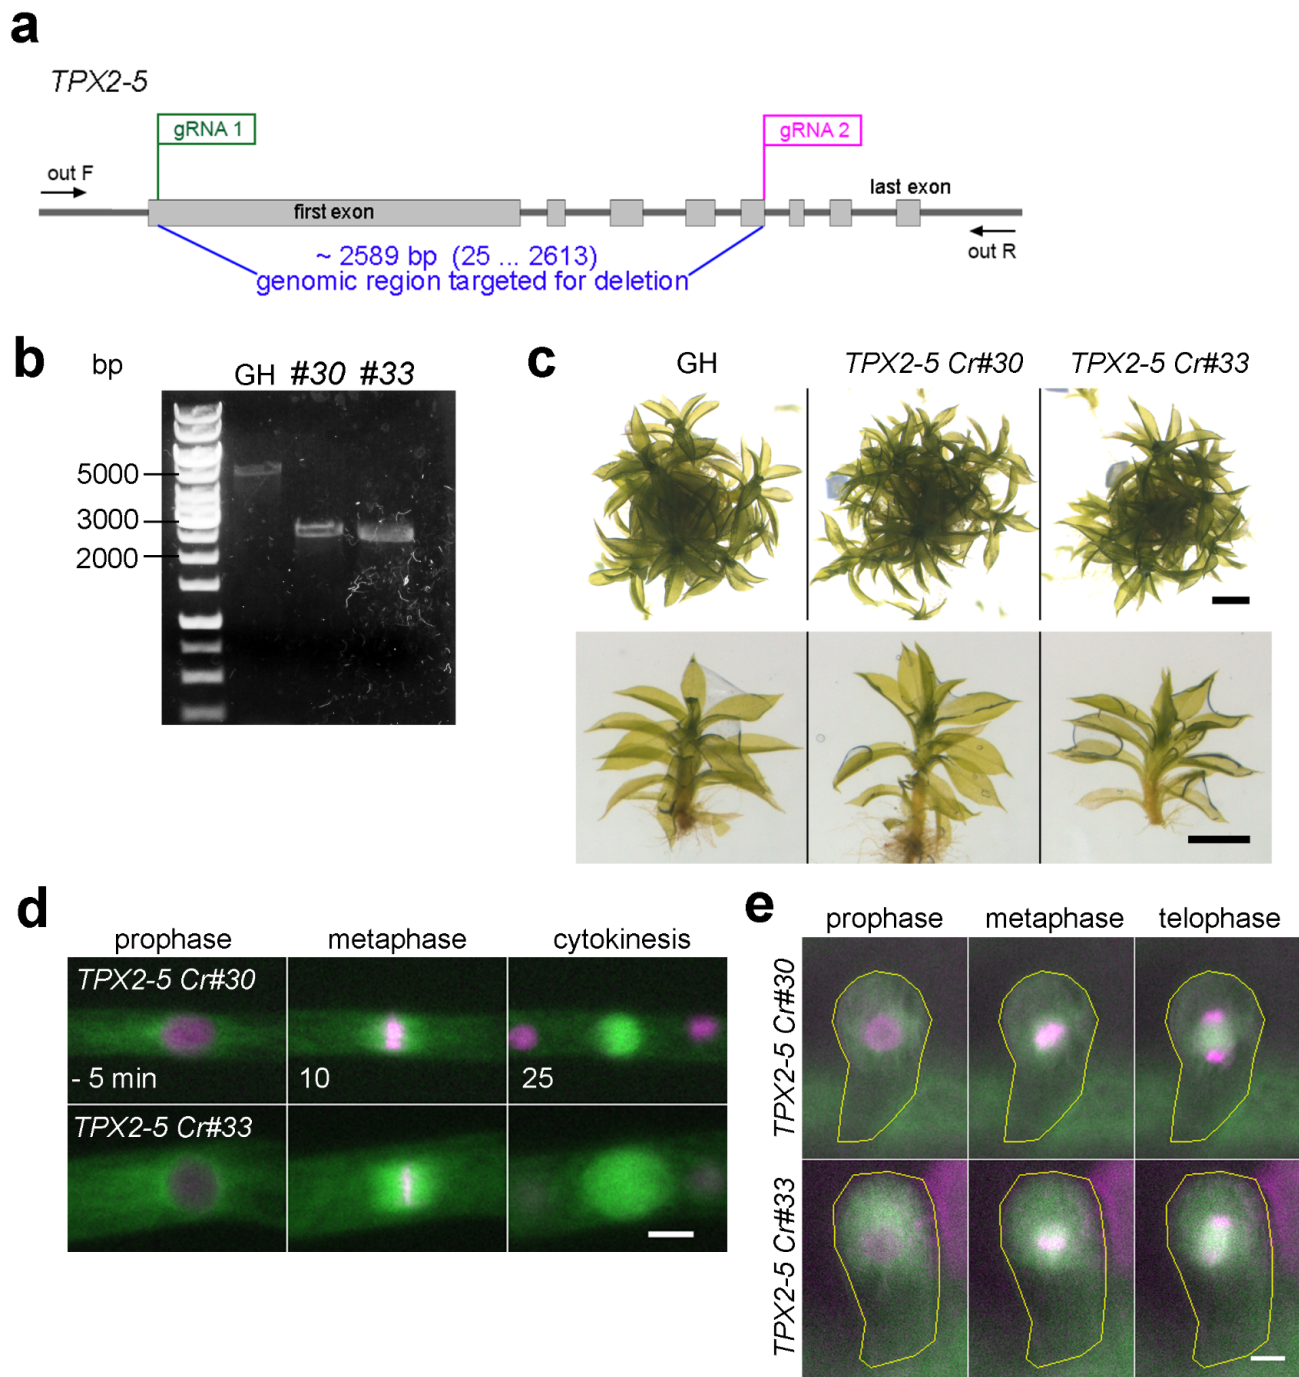

**Supplementary Figure 4. Partial deletion of *TPX2-5* gene by CRISPR in the wild-type background does not lead to cell-division defects.**

**(a)** Schematic representation of *TPX2-5* exons, position of gRNAs and gene region targeted for deletion. **(b)** Results of genotyping PCR of control (GH) with expected band size 5306 bp and two independent colonies with large gene deletion after CRISPR (expected band size ~2700 bp): *TPX2-5 Cr#30* (#30) and *TPX2-5 Cr#33* (#33). Experiment was repeated 2 times with similar results. **(c)** Representative moss colonies and individual gametophores after 4 weeks of culture. Experiment was repeated 2 times with similar results. Bars, 1 mm. **(d)** Representative fluorescence images of cell division in apical protonema cells in *TPX2-5 Cr#30* and *TPX2-5 Cr#33*. Time 0 (min) was set at NEBD. Experiment was repeated 3 times with similar results. Bar, 10  $\mu$ m. **(e)** Representative fluorescence images of the first cell division in gametophore initials in *TPX2-5 Cr#30* and *TPX2-5 Cr#33*. Cell borders are outlined in yellow. Experiment was repeated 3 times with similar results. Bar, 10  $\mu$ m.

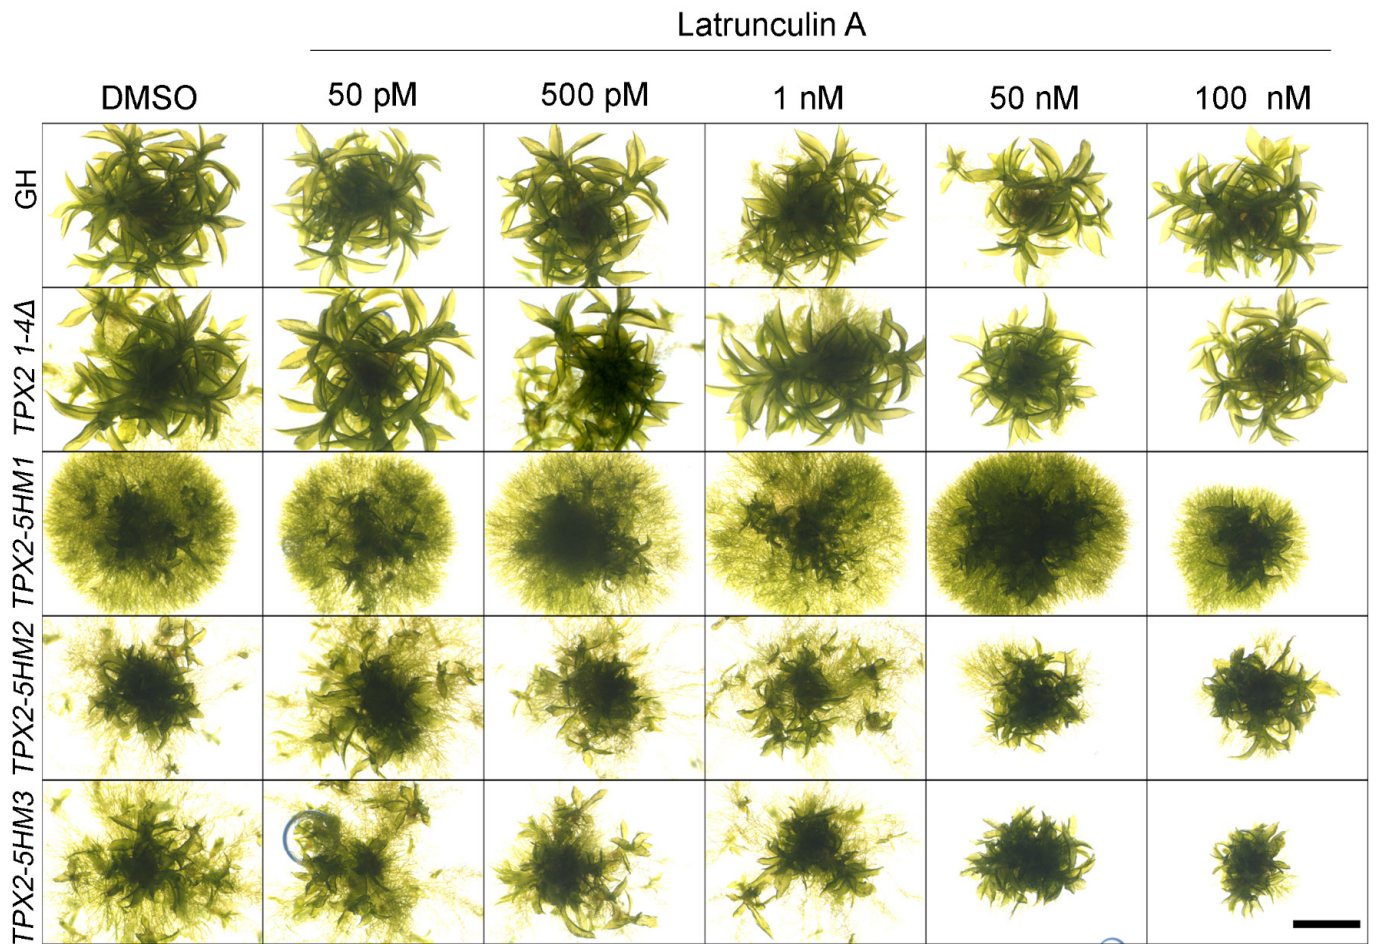

**Supplementary Figure 5. Prolonged latrunculin A treatment does not mitigate stunted gametophores in *TPX2-5* hypomorphic mutants.**

Representative images of moss cultured on agar plates containing DMSO or latrunculin A (50 pM to 100 nM) for 4 weeks. Experiment was repeated 2 times with similar results. Bar, 5 mm.

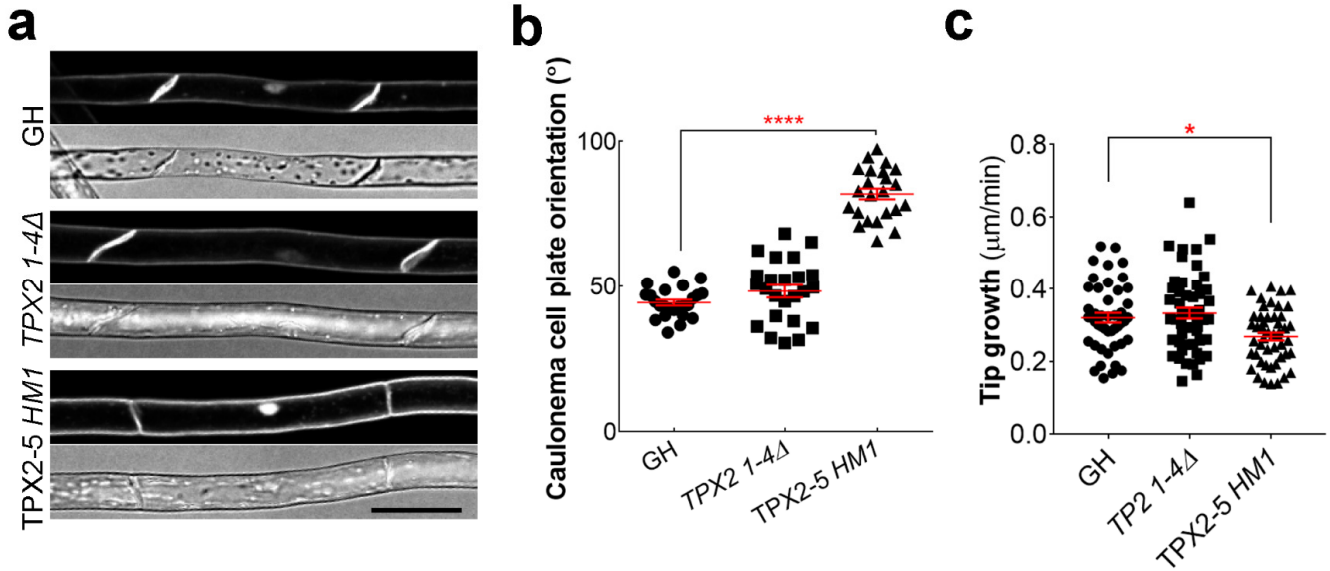

**Supplementary Figure 6. Phragmoplast orientation and tip growth defects in the caulonemal tip cells in the *TPX2-5 HMI* line**

(a) Representative images of cell plates in caulonemal cells stained with 10 μM FM4-64 dye. Experiment was repeated 2 times with similar results. Bar, 50 μm. (b) Acute angle of caulonemal cells in GH (control), *TPX2 1-4Δ* and *TPX2-5 HMI* lines,  $n = 24, 24,$  and  $23,$  respectively (mean±SEM, \*\*\*\*  $p = 0.0001$  one-way ANOVA with Dunnett's multiple comparisons test against GH). (c) Tip growth rate of caulonemal cells in GH, *TPX2 1-4Δ* and *TPX2-5 HMI* lines,  $n = 46, 50$  and  $48,$  respectively (mean±SEM, \*  $p = 0.0144$  one-way ANOVA with Dunnett's multiple comparisons test against GH).

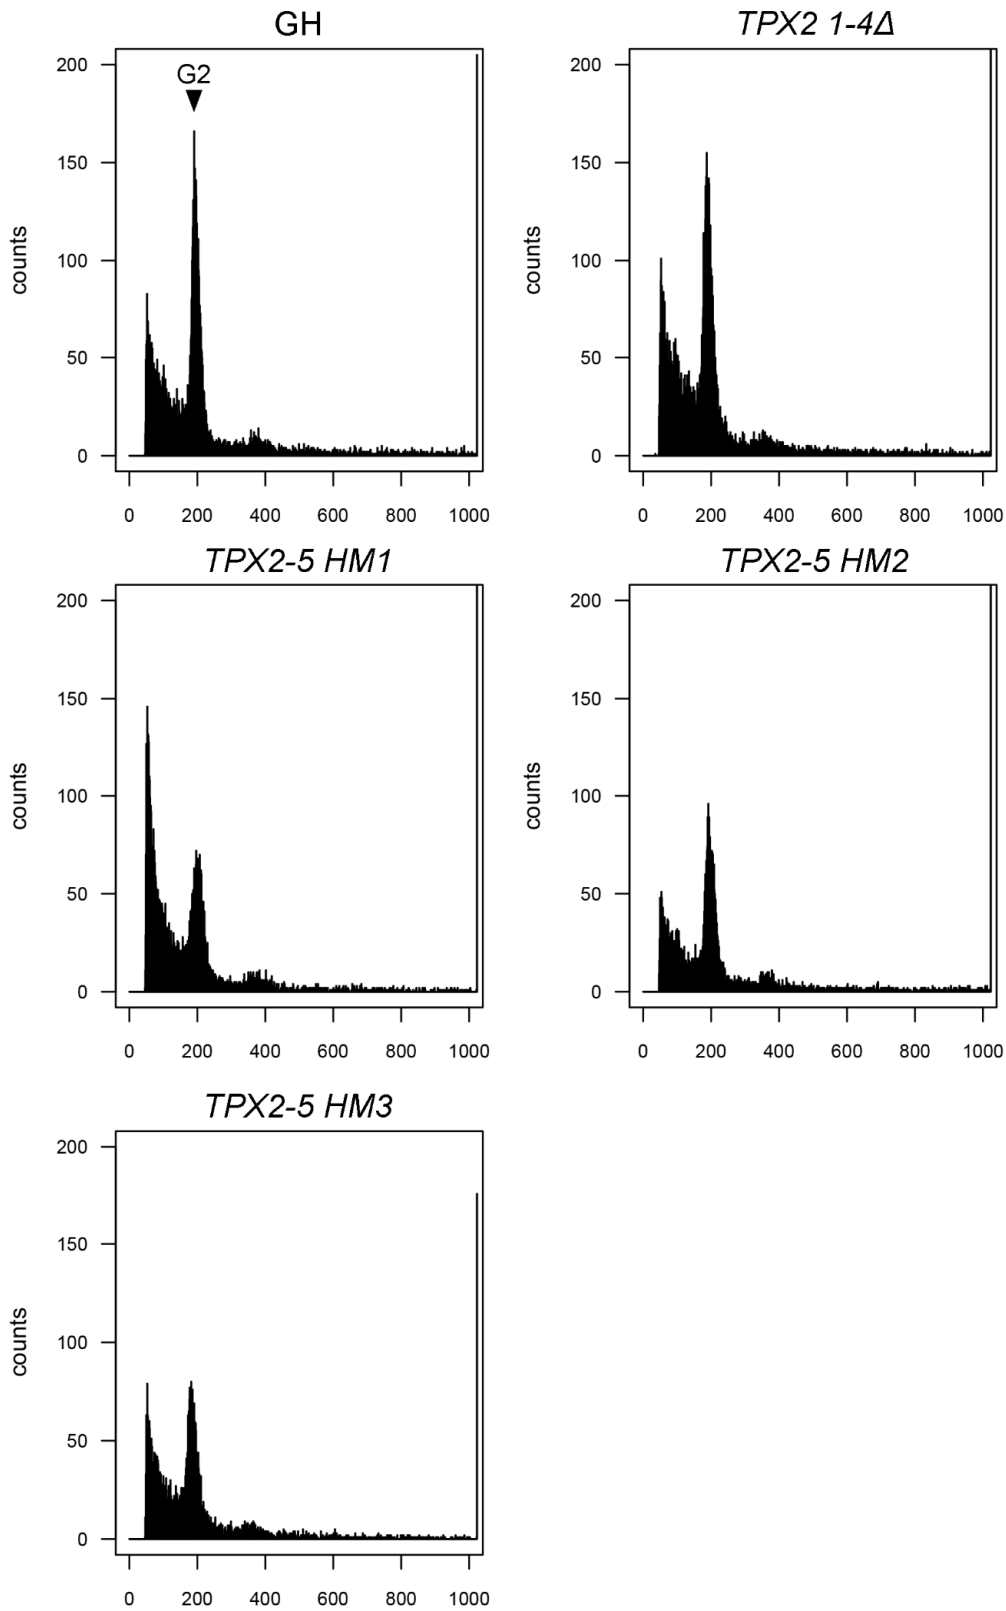

**Supplementary Figure 7. Ploidy analysis of protonema tissue based on nuclei staining with DAPI**

Histograms of nuclei isolated from 6-day-old protonema tissues stained with DAPI. Peak corresponding to G2 (2N) in the control line (GH) is indicated by an arrow.

### **Supplementary Movie 1. Localization of TPX2 proteins during mitosis**

Live-cell imaging was performed in *P. patens* apical caulonemal cells expressing mCherry-tubulin (magenta) and one of the following tagged proteins (green): TPX2-1-Citrine, TPX2-2-mNeonGreen, mNeonGreen-TPX2-4, or TPX2-5-mNeonGreen. Images were acquired every 30 s in a single focal plane. Bar, 10  $\mu\text{m}$ .

### **Supplementary Movie 2. 3D projection of gametophore initial cells after the first division.**

Gametophore initials were stained with 10  $\mu\text{M}$  FM4-64. Cell segmentation was done with PlantSeg. The apical cell of the gametophore initial is shown in pink, while the basal cell is shown in green. Bar, 20  $\mu\text{m}$ .

### **Supplementary Movie 3. Spindle motility underlies the erroneous phragmoplast positioning in *TPX2-5 HMI* gametophore initial cells**

Live-cell imaging was performed in *P. patens* gametophore initial cells expressing mCherry-tubulin and histone H2B-mCherry (chromosomes and MTs are labeled with the same color). Images were acquired as a z-stack (20  $\mu\text{m}$  in 2.5  $\mu\text{m}$  steps) every 5 min, and the best focal plane was presented. Bar, 10  $\mu\text{m}$ .

### **Supplementary Movie 4. Spindle positioning defects in later gametophore development in the *TPX2-5 HMI* mutant.**

Representative video of spindle misorientation and/or motility in *TPX2-5 HMI* gametophore initial cells during the second (left cell) or later (right cell) cell divisions. The spindle axis is indicated by a cyan line. Images were acquired as a z-stack (20  $\mu\text{m}$ , 2.5  $\mu\text{m}$  step) every 5 min, and the best focal plane was presented. Bar, 10  $\mu\text{m}$ .

### **Supplementary Movie 5. Actin distribution during spindle motility in the *TPX2-5 HMI* mutant.**

Live-cell imaging of Citrine-F-tractin (actin, green) during the first asymmetric division in the gametophore initial also expressing mCherry-tubulin (magenta, MTs). *TPX2-5 HMI* cells additionally express mCherry-tubulin/H2B-RFP (magenta, chromosomes). Images were acquired as a z-stack (20  $\mu\text{m}$  in 2.5  $\mu\text{m}$  steps) every 5 min. Top panel shows merged images of maximum intensity projection of Citrine-F-tractin (green) and single best focal frame of mCherry-tubulin (magenta, wild-type) or mCherry-tubulin/H2B-RFP (magenta, *TPX2-5 HMI*). Middle panel shows merged images of best focal plane for Citrine-F-tractin (green) and mCherry-tubulin (magenta, wild-type) or mCherry-tubulin/H2B-RFP (magenta, *TPX2-5 HMI*). Bottom panel shows best focal plane for Citrine-F-tractin (gray). Bar, 10  $\mu\text{m}$

### **Supplementary Movie 6. Spindle-collapse phenotype in the gametophore initial of *TPX2-5 HMI* mutants**

Representative video of spindle collapse followed by chromosome missegregation, observed in approximately 10% of *TPX2-5 HMI* gametophore initial cells. Images were acquired as a z-stack (20  $\mu\text{m}$ , 2.5  $\mu\text{m}$  step) every 5 min, and the best focal plane was presented. Bar, 10  $\mu\text{m}$ .

### **Supplementary Movie 7. Mitotic defects in the *TPX2-5 RNAi* lines**

Representative images of mitotic defects in the *TPX2-5 RNAi* lines. Live-cell imaging was performed in *P. patens* protonemal apical cells expressing GFP-tubulin (green) and histone H2B-mCherry (magenta). Images were acquired at a single focal plane every 2 min. Bar, 10  $\mu\text{m}$ .

### **Supplementary Data 1. Plasmids and primers used in this study**

### **Supplementary Data 2. Transgenic *Physcomitrella* lines used in this study**
